# Supplementary material
Source: publisher figshare collection journal article supplement (https://acs.figshare.com/ndownloader/files/7840465)
Supplement: Supplementary file 1 [file 7840465]

Supporting Information for:

**Gold Suprashells: Enhanced Photothermal Nanoheaters with Multiple LSPR for Broadband SERS**

*Sureyya Paterson, Sebastian A. Thompson, Alastair W. Wark,\* and Roberto de la Rica\**

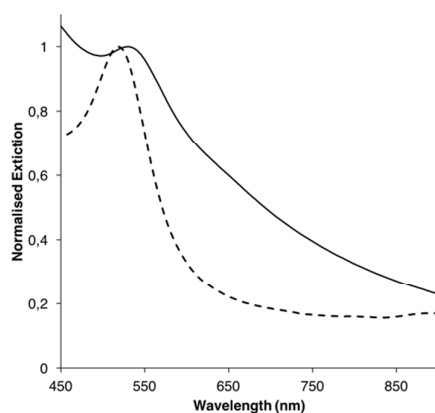

**Figure S1.** Extinction spectrum of the 20 nm gold nanoparticles building blocks used here to assemble gold suprashells (doted lines, ( $\lambda_{\text{max}} = 519$  nm)), and G1 suprashells (continuous line).

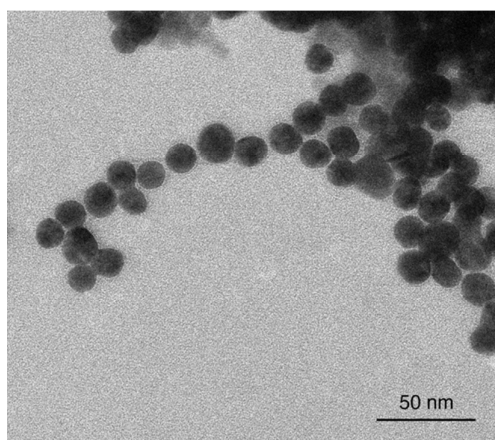

**Figure S2.** Representative TEM image of anisotropic assemblies of nanoparticles in gold suprashells (G3). The inter-particle distance was calculated as the average distance between 150 nanoparticle pairs measured in several images.

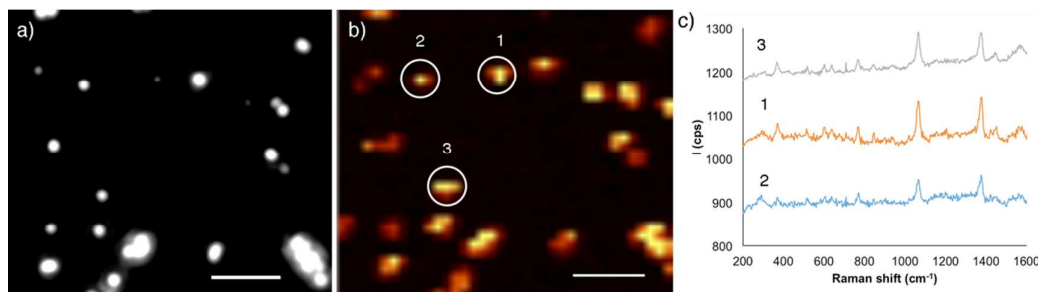

**Figure S3.** SERS mapping of suprashells modified with 2-naphthalenethiol; a), b) Correlated dark-field microscopy (DFM) image and SERS map of G5 suprashells adsorbed onto a glass slide; c) Representative SERS spectra of single suprashells (highlighted with a circle in (b)). SERS images were generated from analysis of the peak intensity at  $\sim 1064\text{ cm}^{-1}$  with respect to the background signal with the brightest points corresponding to intensities  $>300\text{ counts/s (cps)}$ . Scale bars:  $5\text{ }\mu\text{m}$ .

**Experimental:** Glass slides were cleaned by ultrasonic treatment in acetone for 5 min followed by rinsing with ethanol and deionized water, and drying with nitrogen. The slides were then immersed in Hellmanex<sup>TM</sup> for at least 1 h, rinsed with abundant water and dried with nitrogen. Subsequently the slides were immersed in a 1% (v/v) solution of poly(diallyldimethylammonium chloride) (PDDA) for 30 min. The slides were then rinsed with deionized water and dried with nitrogen.  $100\text{ }\mu\text{L}$  of the suprashell dispersion was placed onto the substrates for 10 min. The nanoparticles were adsorbed onto the PDDA-covered slide due to the electrostatic interaction between the citrate-capped nanoparticles and positively charged glass surface. The slides were then covered with  $1\text{ }\mu\text{M}$  2-naphthalenethiol solution for 10 minutes, rinsed with water and dried with nitrogen. Correlated dark-field and SERS imaging was performed on two different microscopes with reference marks on the slide surface used to identify different regions. Raman maps were obtained using a confocal WITec Alpha300R instrument at 633 nm excitation. All maps were acquired using a  $100\times$  objective (Olympus MPlan, NA = 0.9). Areas up to  $20 \times 20\text{ }\mu\text{m}$  in size were imaged in  $\sim 0.6\text{ }\mu\text{m}$  steps. An incident laser power of  $\sim 0.9\text{ mW}$ , spot size  $\sim 0.6\text{ }\mu\text{m}$  and signal integration time of 1 s was used. The SERS maps were created by plotting the difference between the maximum and minimum intensities in the  $980\text{--}1100\text{ cm}^{-1}$  window, targeting the peak at  $1064\text{ cm}^{-1}$  and a preceding background region of the spectrum.

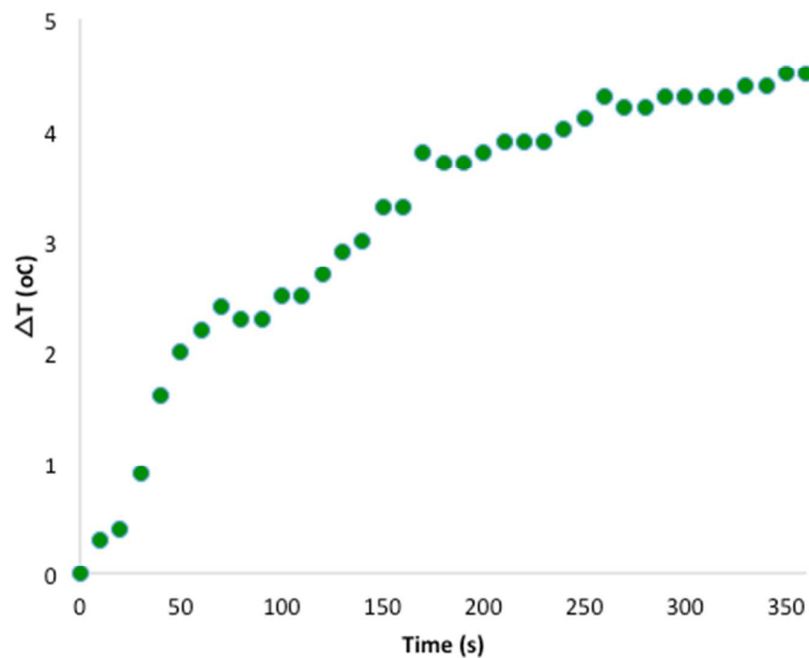

**Figure S4.** Increase in temperature with time when exciting G5 gold suprashells with a 514 nm CW laser (27 mW).

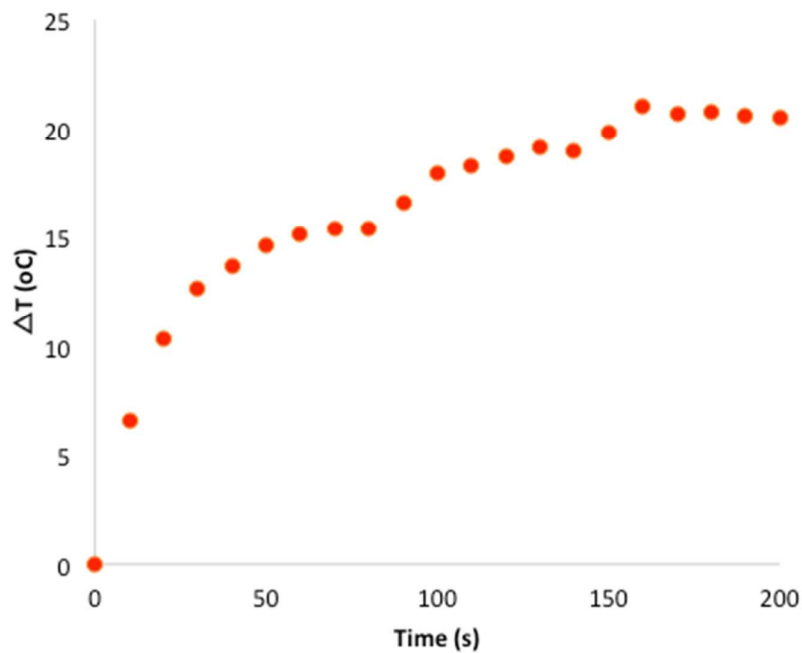

**Figure S5.** Increase in temperature with time when exciting G5 gold suprashells with a 785 nm CW laser (235 mW).

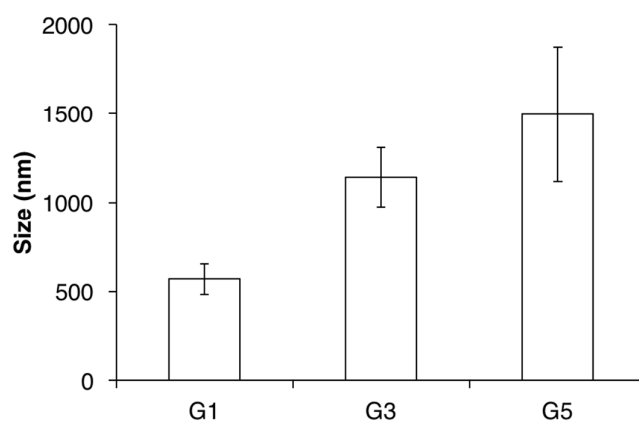

**Figure S6.** Size distribution of G1, G3 and G5 suprashells obtained with dynamic light scattering (DLS). Error bars are the standard deviation.

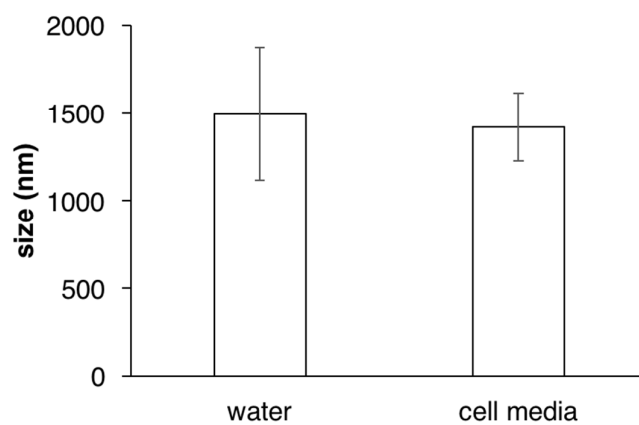

**Figure S7.** DLS size distribution of G5 dispersed in water or cell media. Error bars are the standard deviation.
